# Supplementary material
Source: PubMed Central journal article supplement (PMC3371237)
Supplement: supp_M021725_jlr.M021725-1.pdf [file supp_M021725_jlr.M021725-1.pdf]

## Supplementary Table 1

### Primer sequences

| <b>GENE</b>    | <b>FORWARD PRIMER</b>          | <b>REVERSE PRIMER</b>          |
|----------------|--------------------------------|--------------------------------|
| $\beta$ -Actin | 5'-GACCCAGATCATGTTTGAGA-3'     | 5'-GAGCATAGCCCTCGTAGAT-3'      |
| SAA1           | 5'-ACACCAGGATGAAGCTACTCACCA-3' | 5'-CCCTTGGAAGCCTCGTGAACAAA-3'  |
| SAA2           | 5'-AGCTGGCTGGAAAGATGGAGACAA-3' | 5'-TGTCCTCTGCCGAAGAATTCCTGA-3' |
| SAA3           | 5'-TAAAGTCATCAGCGATGCCAGAG-3'  | 5'-CAACCCAGTAGTTGCTCCTCTTC-3'  |
| F4/80          | 5'-CTTTGGCTATGGGCTTCCAGTC-3'   | 5'-GCAAGGAGGACAGAGTTTATCGTG-3' |
| CD11C          | 5'-CTGGATAGCCTTTCTTCTGCTG-3'   | 5'-GCACACTGTGTCCGAATC-3'       |
| NOS2           | 5'-AATCTTGAGCGAGTTGTGG-3'      | 5'-CAGGAAGTAGGTGAGGGCTTG-3'    |
| CD301          | 5'-TGAGAAAGGCTTTAAGAACTGGG-3'  | 5'-GACCACCTGTAGTGATGTGGG-3'    |
| CD206          | 5'-TGTGGTGAGCTGAAAGGTGA-3'     | 5'-CAGGTGTGGGCGCAGGTAGT-3'     |
| CD163          | 5'-TCCACACGTCCAGAACAGTC-3'     | 5'-CCTTGGAACAGAGACAGGC-3'      |
| Mac-2          | 5'-ATGAAGAACCTCCGGGAAAT-3'     | 5'-GCTTAGATCATGGCGTGGTT-3'     |
| VEGF-A         | 5'-GGAGATCCTTCGAGGAGCACTT      | 5'-GGCGATTTAGCAGCAGATATAAGAA   |
| MPO            | 5'-CACCTCTTTGTTTCGAGAGC-3'     | 5'-CAACACCAAGGGCAGGTAGT-3'     |
| MCP-1          | 5'-ACTGAAGCCAGCTCTCTCTCC-3'    | 5'-TTCCTTCTTGGGGTCAGCACAG-3'   |
| MIP1- $\alpha$ | 5'-TGCCCTTGCTGTTCTTCTCT-3'     | 5'-CAGGCATTGAGTCCAGGTC-3'      |
| Adiponectin    | 5'-GGAGATGCAGGTCTTCTTGG-3'     | 5'-CGAATGGGTACATTGGGAAC-3'     |
