# Supplementary material
Source: PubMed Central journal article supplement (PMC3371237)
Supplement: supp_M021725_jlr.M021725-3.pdf [file supp_M021725_jlr.M021725-3.pdf]

## SUPPLEMENTAL FIGURE LEGENDS

### **Figure 1**

SAA1 and SAA2 mRNA expression in gonadal adipose tissue (GWAT) and liver from chow-fed, 8 weeks high fat diet fed and *ob/ob* mice.

### **Figure 2**

PEPCK and SREBP1c mRNA expression in inguinal adipose tissue (IWAT), gonadal adipose tissue (GWAT) and liver of fed and 24h fasted wild type FVB mice (A). PEPCK, SREBP1c and AGP mRNA expression in GWAT and liver of high fat diet-induced obese fed and 24h fasted wild type FVB mice (B).
