# Supplementary material
Source: PubMed Central journal article supplement (PMC3371237)

# Figure 1

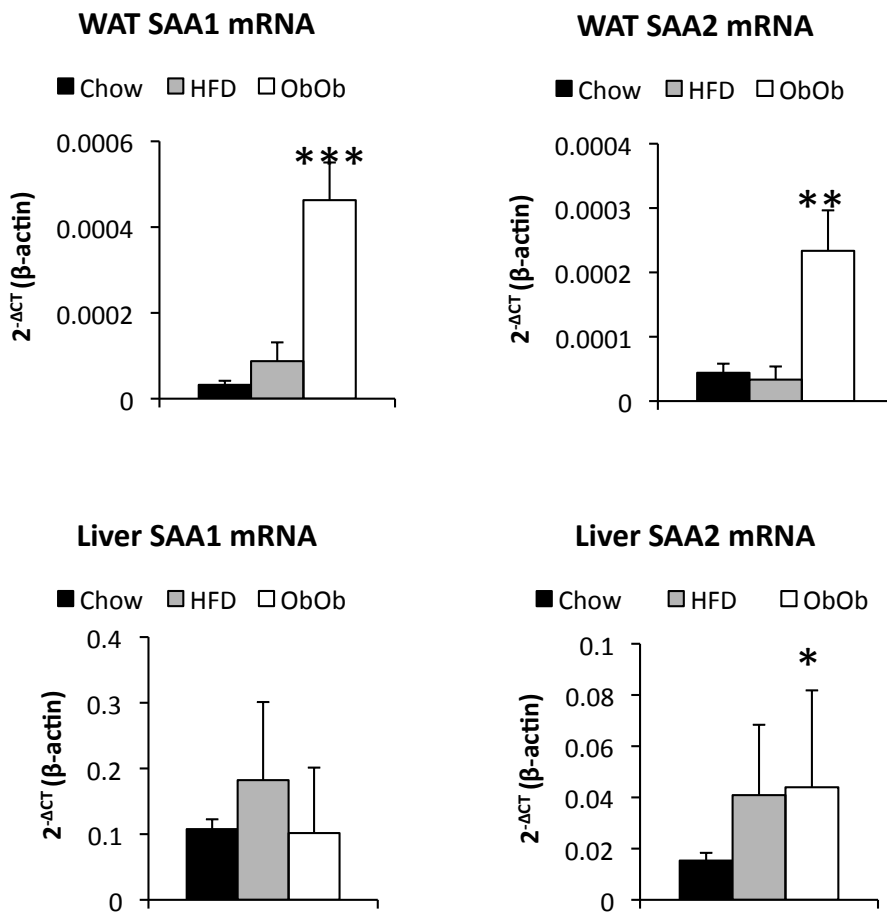

# Figure 2

## A. Chow-fed mice

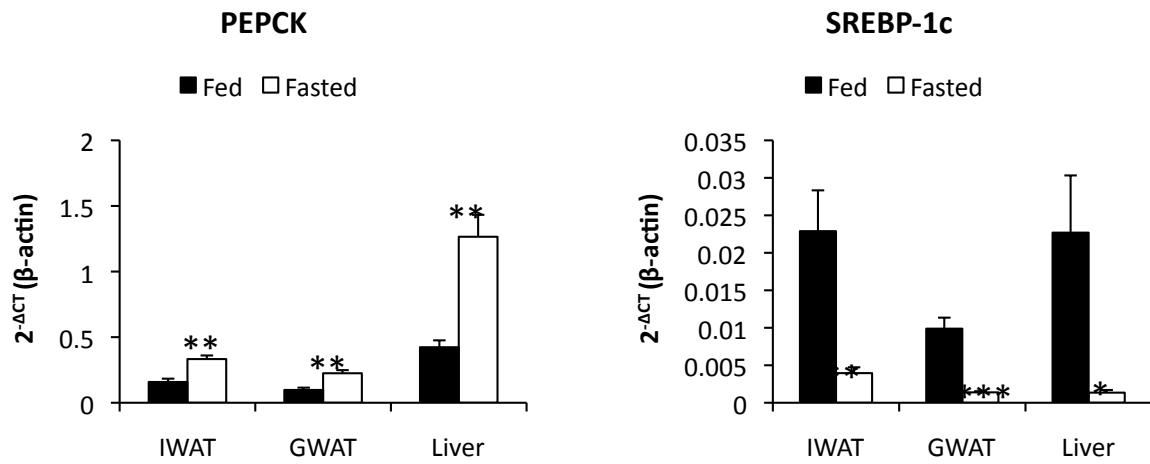

## B. HFD-fed mice

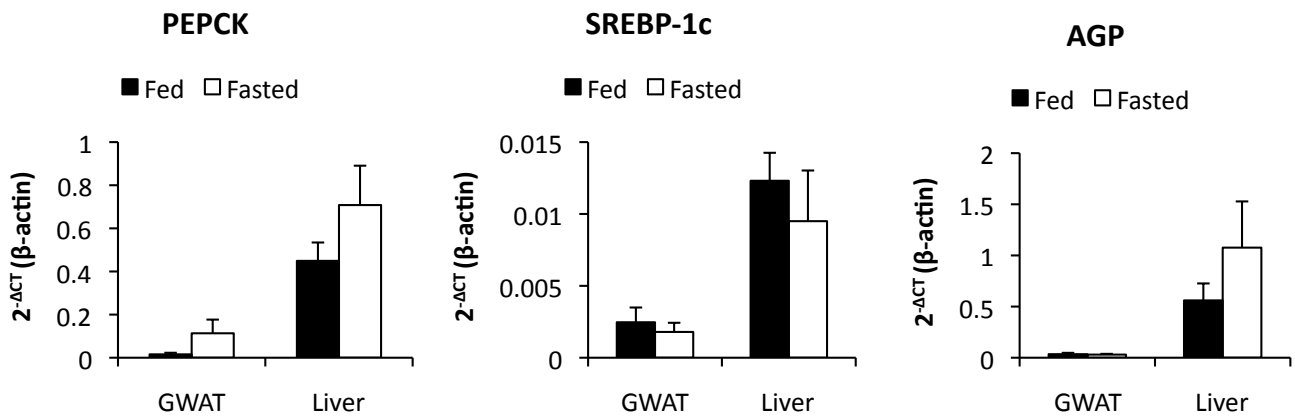

Supplement: supp_M021725_jlr.M021725-2.pdf [file supp_M021725_jlr.M021725-2.pdf]
